# Supplementary material
Source: Springer Nature journal article supplement (https://www.springermedizin.de/resource/supplementary/12885_2008_1364_MOESM3_ESM.pdf/9472516)

**Serum Insulin-like Growth Factor-1**

**(ng/ml)**

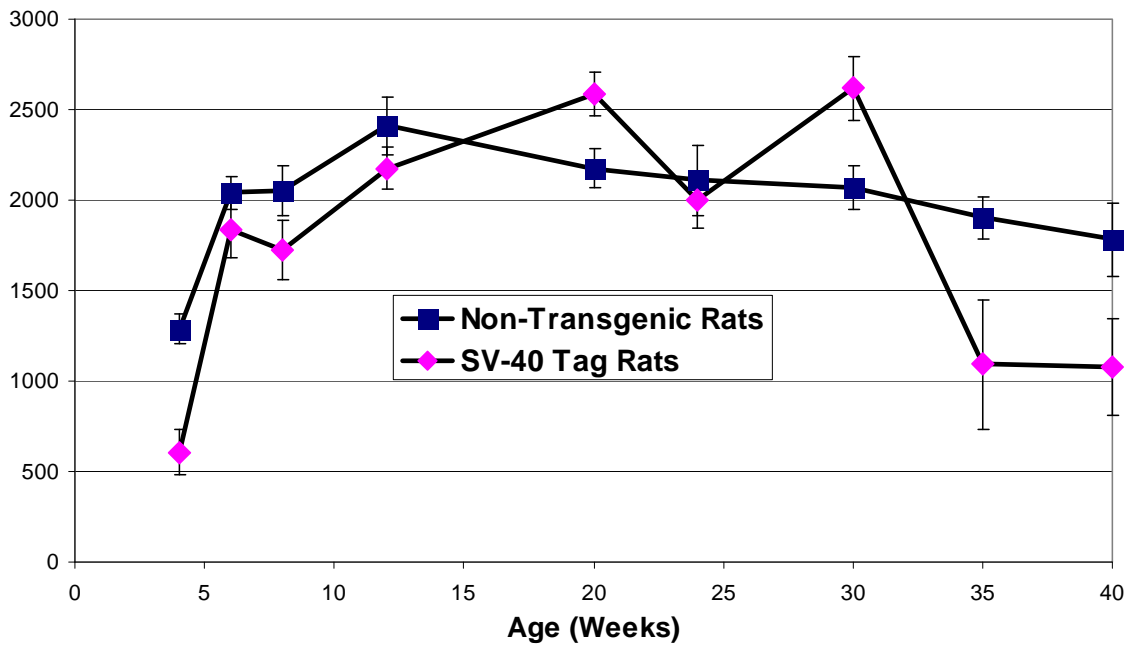

Supplement: MOESM3 [file 9472516]
